# Supplementary material for: A high mass loading flexible electrode with a sheet-like Mn3O4/NiMoO4@NiCo LDH on a carbon cloth for supercapacitors
Source: Royal Society of Chemistry journal article supplement (doi:10.1039/d3ra06937k), 2023-01-01
Supplement: d3ra06937k1.pdf [file d3ra06937k1.pdf]

# High Mass Loading Flexible Electrode with Sheet-like $\text{Mn}_3\text{O}_4/\text{NiMoO}_4@\text{NiCo}$ LDH on Carbon Cloth for supercapacitor

Ruibin Liang<sup>‡a</sup>, Si Liu<sup>‡a</sup>, Jianrong Lin<sup>a</sup>, Jingfei Dai<sup>a</sup>, Jingyi Peng<sup>a</sup>, Peiyuan Huang<sup>a</sup>, Jianwen Chen<sup>b</sup>,

Peng Xiao<sup>a\*</sup>

<sup>a</sup> Guangdong-Hong Kong-Macao Joint Laboratory for Intelligent Micro-Nano Optoelectronic Technology, School of Physics and Optoelectronic Engineering, Foshan University, Foshan 528225, China ;

<sup>b</sup> School of Electronic and Information Engineering, Foshan University, Foshan, 528000, China

\*Correspondence: [xiaopeng@fosu.edu.cn](mailto:xiaopeng@fosu.edu.cn).

<sup>‡</sup> These authors contributed equally to this work.

## Supplementary data

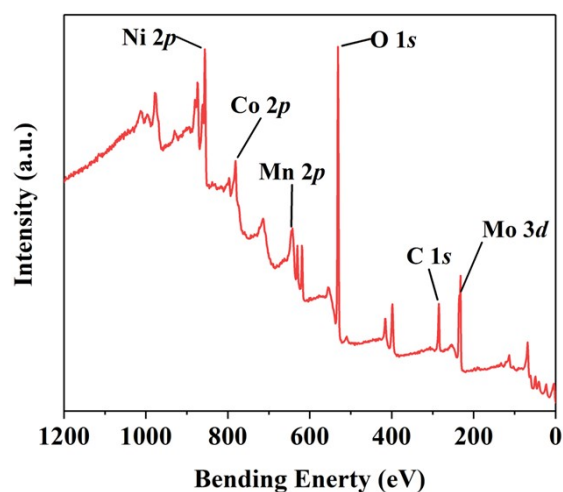

Figure S1 XPS spectrum of the MO/NMO/NiCo LDH

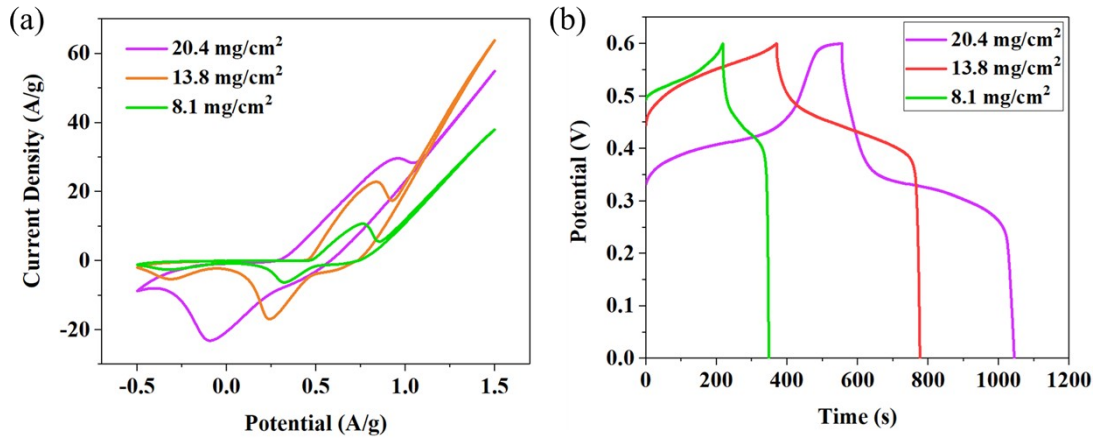

Figure S2 curves of MO/NMO/NiCo LDH with different mass loading (a) CV; (b) GCD

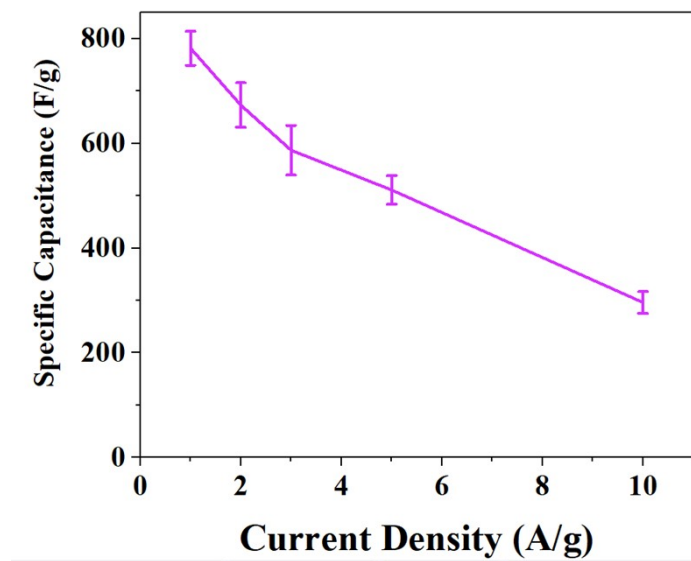

Figure S3 error bars of the specific capacitance of MO/NMO/NiCo LDH at different current density

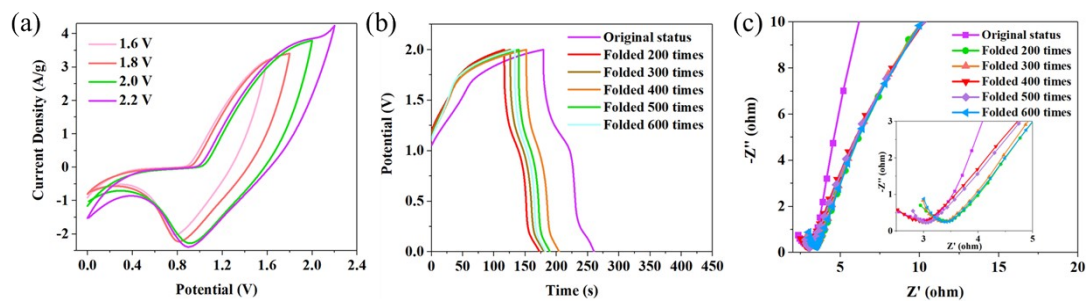

Figure S4 (a) CV curves of the FSC at 50 mV/s with different potential window; (b) GCD curves of the FSC at different bending condition; (d) EIS curves of the FSC at different bending condition

Table S1 CV curve area of each status at the scan rate of 50 mV/s

|                  | Original status | Folded<br>200 times | Folded<br>300 times | Folded<br>400 times | Folded<br>500 times | Folded<br>600 times |
|------------------|-----------------|---------------------|---------------------|---------------------|---------------------|---------------------|
| CV curve<br>area | 3.768           | 2.509               | 2.487               | 2.525               | 2.576               | 2.543               |
